# Supplementary material
Source: publisher figshare collection journal article supplement (https://tandf.figshare.com/ndownloader/files/15577544)
Supplement: Supplementary file 1 [file 15577544]

**Supplementary Table 1**. Chemical composition (g/100g) of the feather-free body; male and females turkeys from BUT and HYB breeds

| Dry Matter | | | | | | | | | |
| --- | --- | --- | --- | --- | --- | --- | --- | --- | --- |
| Breed-Sex | 7d | 14d | 21d | 35d | 56d | 77d | 119d | 126d | 140d |
| BUT-M | 23.9 | 25.1 | 25.7 | 27.0 | 30.2 | 32.1 | 37.7 | - | 37.3 |
| BUT-F | 24.5 | 25.0 | 26.4 | 28.5 | 30.3 | 37.0 | - | 39.1 | - |
| HYB-M | 24.0 | 25.8 | 26.0 | 27.4 | 29.9 | 31.5 | 37.2 | - | 35.5 |
| HYB-F | 24.9 | 26.5 | 26.7 | 28.4 | 31.2 | 36.3 | - | 45.2 | - |
| *(SEM)* | *0.34* | *0.26* | *0.28* | *0.85* | *0.70* | *0.71* | *1.31* | *0.80* | *1.33* |
| *(Signif.)1* | *Sx* | *St* | *Sx* | *-* | *-* | *Sx* | *-* | *St* | *-* |
|  |  |  |  |  |  |  |  |  |  |
| Crude Protein | | | | | | | | | |
| BUT-M | 17.2 | 18.3 | 20.3 | 18.7 | 19.8 | 22.9 | 20.5 | - | 20.0 |
| BUT-F | 17.7 | 19.0 | 20.7 | 19.4 | 19.7 | 23.2 | - | 18.9 | - |
| HYB-M | 17.3 | 19.4 | 20.3 | 19.5 | 19.7 | 24.0 | 19.2 | - | 19.7 |
| HYB-F | 18.4 | 19.5 | 20.9 | 19.9 | 21.8 | 20.3 | - | 17.1 | - |
| (SEM) | *0.21* | *0.45* | *0.31* | *0.33* | *0.37* | *0.40* | *0.78* | *0.36* | *0.95* |
| *(Signif.)* | *Sx* | *-* | *-* | *-* | *St Sx StSx* | *St Sx StSx* | *-* | *St* | *-* |
|  |  |  |  |  |  |  |  |  |  |
| Crude Fat | | | | | | | | | |
| BUT-M | 2.96 | 3.16 | 1.71 | 2.82 | 3.91 | 5.53 | 11.58 | - | 12.19 |
| BUT-F | 3.49 | 2.19 | 1.85 | 3.65 | 6.62 | 11.92 | - | 17.57 | - |
| HYB-M | 3.22 | 2.52 | 1.72 | 3.00 | 4.27 | 6.56 | 11.05 | - | 12.42 |
| HYB-F | 3.80 | 2.53 | 1.60 | 5.19 | 6.03 | 11.33 | - | 23.64 | - |
| *(SEM)* | *0.30* | *0.24* | *0.24* | *0.42* | *0.69* | *1.09* | *1.08* | *1.26* | *1.39* |
| *(Signif.)* | *-* | *-* | *-* | *Sx* | *Sx* | *Sx* | *-* | *St* | *-* |
|  |  |  |  |  |  |  |  |  |  |
| Ash | | | | | | | | | |
| BUT-M | 2.81 | 3.14 | 3.45 | 3.53 | 3.74 | 4.06 | 3.62 | - | 3.03 |
| BUT-F | 2.66 | 3.01 | 3.76 | 3.44 | 3.29 | 3.51 | - | 2.72 | - |
| HYB-M | 2.81 | 3.00 | 3.40 | 3.39 | 3.85 | 3.35 | 4.28 | - | 2.76 |
| HYB-F | 3.10 | 3.31 | 3.94 | 3.30 | 4.08 | 3.20 | - | 3.65 | - |
| *(SEM)* | *0.15* | *0.13* | *0.13* | *0.24* | *0.26* | *0.32* | *0.46* | *0.35* | *0.26* |
| *(Signif.)* | *-* | *-* | *Sx* | *-* | *-* | *-* | *-* | *-* | *-* |
| 1 - indicates significant effects (P<0.05): St – breed; Sx – sex; StSx – breed x sex interaction | | | | | | | | | |
